# Supplementary material for: The effect of plastic additives on Shewanella oneidensis growth and function
Source: Royal Society of Chemistry journal article supplement (doi:10.1039/d1em00108f), 2021-01-01
Supplement: d1em00108f1.pdf [file d1em00108f1.pdf]

Electronic Supporting Information for

**The Effect of Plastic Additives on *Shewanella oneidensis* Growth and Function**

Liam P. Fawcett<sup>†a</sup>, Victoria S. Fringer<sup>†a</sup>, Jessica R. Sieber<sup>b</sup>, and Melissa A. Maurer-Jones<sup>\*a</sup>

<sup>a</sup> Department of Chemistry and Biochemistry, University of Minnesota Duluth, Duluth MN USA  
55812

<sup>b</sup> Department of Biology, University of Minnesota Duluth, Duluth MN USA 55812

<sup>†</sup> Co-first authors

\* Corresponding Author

[maujones@d.umn.edu](mailto:maujones@d.umn.edu)

218-726-7088

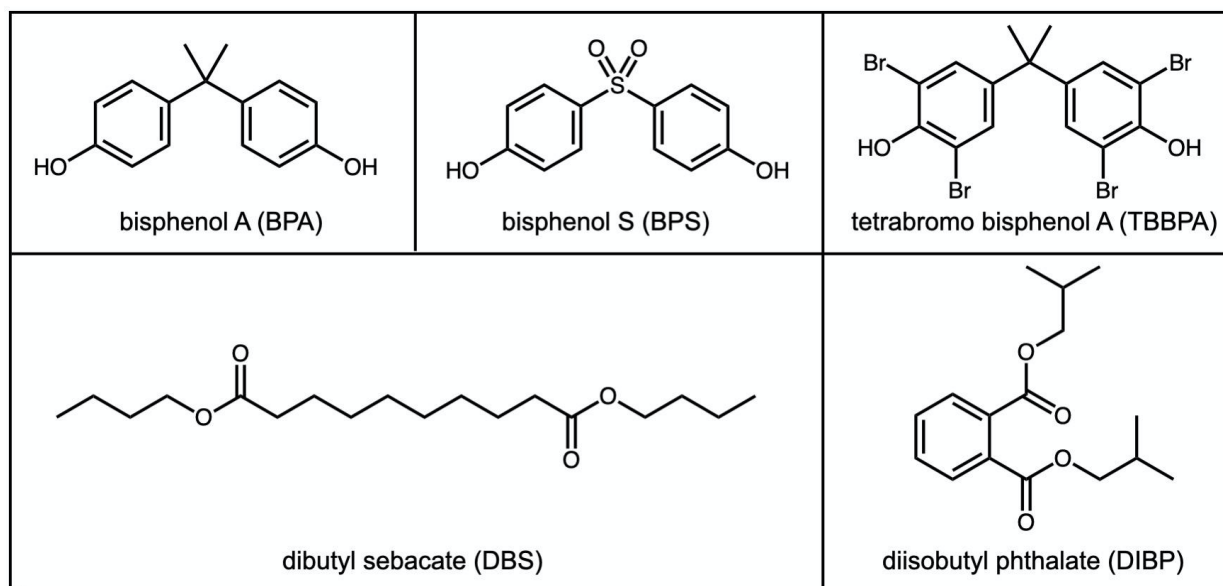

Figure S1: Molecular structures of additives under consideration

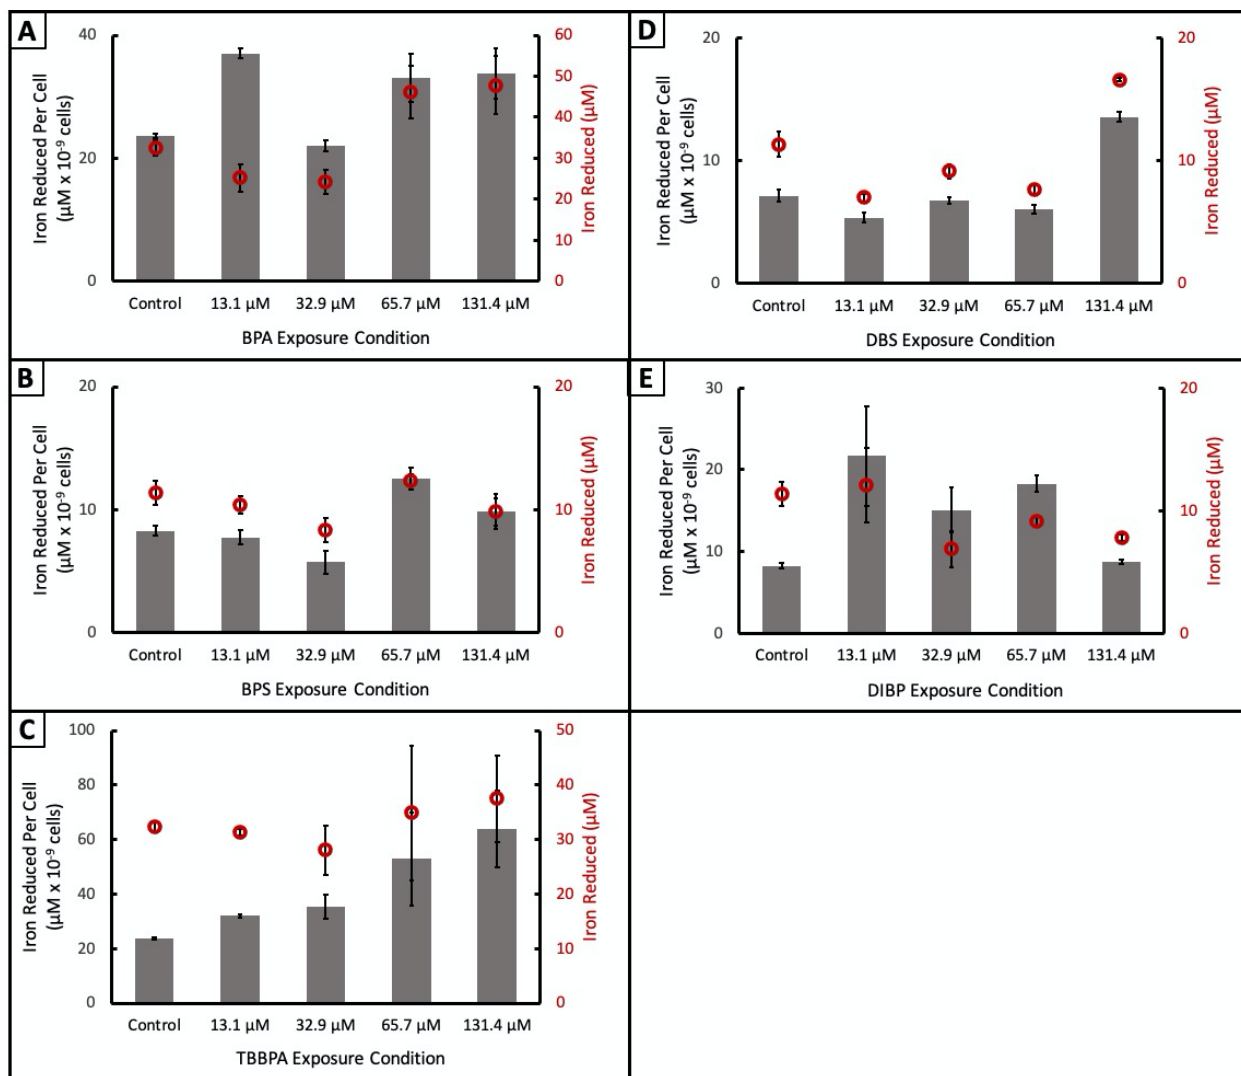

Figure S2. Reduced iron per cell (gray bars) and absolute concentration (red circles) of *S. oneidensis* in anaerobic conditions exposed to A. BPA, B. BPS, C. TBBPA, D. DBS, and E. DIBP. Values represent the means and error bars the standard deviation.
